# Supplementary material for: The biological basis of degenerative disc disease: proteomic and biomechanical analysis of the canine intervertebral disc
Source: PubMed Central journal article supplement (PMC4560915; doi:10.1186/s13075-015-0733-z), 2015-09-05
Supplement: 13075_2015_733_MOESM1_ESM.pdf [file 13075_2015_733_MOESM1_ESM.pdf]

| Protein Ratio Feature Table |                          |                                                                                                   |
|-----------------------------|--------------------------|---------------------------------------------------------------------------------------------------|
| Master N                    | Accession                | Name                                                                                              |
| 1                           | sp Q28343 PGCA_CANFA     | Aggrecan core protein OS=Canis familiaris GN=ACAN PE=2 SV=2                                       |
| 2                           | sp P07589 FINC_BOVIN     | Fibronectin OS=Bos taurus GN=FN1 PE=1 SV=4                                                        |
| 3                           | sp P08670 VIME_HUMAN     | Vimentin OS=Homo sapiens GN=VIM PE=1 SV=4                                                         |
| 4                           | sp Q13813-2 SPTA2_HUMAN  | Isoform 2 of Spectrin alpha chain, brain OS=Homo sapiens GN=SPTAN1                                |
| 5                           | sp P17182 ENOA_MOUSE     | Alpha-enolase OS=Mus musculus GN=Eno1 PE=1 SV=3                                                   |
| 6                           | sp P08728 K1C19_BOVIN    | Keratin, type I cytoskeletal 19 OS=Bos taurus GN=KRT19 PE=2 SV=1                                  |
| 7                           | sp P25473 CLUS_CANFA     | Clusterin OS=Canis familiaris GN=CLU PE=2 SV=1                                                    |
| 8                           | sp P05787 K2C8_HUMAN     | Keratin, type II cytoskeletal 8 OS=Homo sapiens GN=KRT8 PE=1 SV=7                                 |
| 9                           | sp Q4KY93 G3P_SPECI      | Glyceraldehyde-3-phosphate dehydrogenase OS=Spermophilus citellus GN=GAPDH PE=2 SV=3              |
| 10                          | sp P14618-2 KPYM_HUMAN   | Isoform M1 of Pyruvate kinase isozymes M1/M2 OS=Homo sapiens GN=PKM2                              |
| 11                          | sp Q15335 CHAD_HUMAN     | Chondroadherin OS=Homo sapiens GN=CHAD PE=2 SV=2                                                  |
| 12                          | sp Q62261 SPTB2_MOUSE    | Spectrin beta chain, brain 1 OS=Mus musculus GN=Sptbn1 PE=1 SV=2                                  |
| 13                          | sp Q7YQC6 HSP71_CANFA    | Heat shock 70 kDa protein 1 OS=Canis familiaris GN=HSPA1 PE=2 SV=1                                |
| 14                          | sp Q9NZN4 EHD2_HUMAN     | EH domain-containing protein 2 OS=Homo sapiens GN=EHD2 PE=1 SV=2                                  |
| 15                          | sp Q3T0P6 PGK1_BOVIN     | Phosphoglycerate kinase 1 OS=Bos taurus GN=PGK1 PE=2 SV=3                                         |
| 16                          | sp P12111 CO6A3_HUMAN    | Collagen alpha-3(VI) chain OS=Homo sapiens GN=COL6A3 PE=1 SV=4                                    |
| 17                          | sp Q29393 PGS2_CANFA     | Decorin OS=Canis familiaris GN=DCN PE=2 SV=2                                                      |
| 18                          | sp A5D7D1 ACTN4_BOVIN    | Alpha-actinin-4 OS=Bos taurus GN=ACTN4 PE=2 SV=1                                                  |
| 19                          | sp P63261 ACTG_HUMAN     | Actin, cytoplasmic 2 OS=Homo sapiens GN=ACTG1 PE=1 SV=1                                           |
| 20                          | sp P02458 CO2A1_HUMAN    | Collagen alpha-1(II) chain OS=Homo sapiens GN=COL2A1 PE=1 SV=3                                    |
| 21                          | sp Q5OQ56 XYLT1_CANFA    | Xylyltransferase 1 OS=Canis familiaris GN=XYLT1 PE=2 SV=1                                         |
| 22                          | sp Q09666 AHNK_HUMAN     | Neuroblast differentiation-associated protein AHNK OS=Homo sapiens GN=AHNAK PE=1 SV=2             |
| 23                          | sp P54714 TPIS_CANFA     | Triosephosphate isomerase OS=Canis familiaris GN=TP1I PE=1 SV=3                                   |
| 24                          | sp Q6TEQ7 ANXA2_CANFA    | Annexin A2 OS=Canis familiaris GN=ANXA2 PE=1 SV=1                                                 |
| 25                          | sp A1A4K5 ENPP2_BOVIN    | Ectonucleotide pyrophosphatase/phosphodiesterase family member 2 OS=Bos taurus GN=ENPP2 PE=1 SV=1 |
| 26                          | sp P16015 CAH3_MOUSE     | Carbonic anhydrase 3 OS=Mus musculus GN=Ca3 PE=1 SV=3                                             |
| 27                          | sp Q9NZN3 EHD3_HUMAN     | EH domain-containing protein 3 OS=Homo sapiens GN=EHD3 PE=1 SV=2                                  |
| 28                          | sp Q684U9 PRDX1_MYOLU    | Peroxiredoxin-1 OS=Myotis lucifugus GN=PRDX1 PE=1 SV=1                                            |
| 29                          | sp Q9DBU1 PGAM1_MOUSE    | Phosphoglycerate mutase 1 OS=Mus musculus GN=Pgam1 PE=1 SV=3                                      |
| 30                          | sp Q99985 SEM3C_HUMAN    | Semaphorin-3C OS=Homo sapiens GN=SEMA3C PE=1 SV=2                                                 |
| 31                          | sp P35444 COMP_RAT       | Cartilage oligomeric matrix protein OS=Rattus norvegicus GN=Comp PE=1 SV=1                        |
| 32                          | sp P30427 PLEC_RAT       | Plectin OS=Rattus norvegicus GN=Plec PE=1 SV=2                                                    |
| 33                          | sp Q4R586 LDHB_MACFA     | L-lactate dehydrogenase B chain OS=Macaca fascicularis GN=LDHB PE=2 SV=3                          |
| 34                          | sp P04075 ALDOA_HUMAN    | Fructose-bisphosphate aldolase A OS=Homo sapiens GN=ALDOA PE=1 SV=2                               |
| 35                          | sp Q258K2 MYH9_CANFA     | Myosin-9 OS=Canis familiaris GN=MYH9 PE=2 SV=1                                                    |
| 36                          | sp P05784 K1C18_MOUSE    | Keratin, type I cytoskeletal 18 OS=Mus musculus GN=Krt18 PE=1 SV=5                                |
| 37                          | sp P26038 MOES_HUMAN     | Moesin OS=Homo sapiens GN=MSN PE=1 SV=3                                                           |
| 38                          | sp P62936 PIIA_PIG       | Peptidyl-prolyl cis-trans isomerase A OS=Sus scrofa GN=PIIA PE=1 SV=2                             |
| 39                          | sp P47942 DPYL2_RAT      | Dihydropyrimidinase-related protein 2 OS=Rattus norvegicus GN=Dpysl2 PE=1 SV=1                    |
| 40                          | sp Q28275 FINC_CANFA     | Fibronectin (Fragment) OS=Canis familiaris GN=FN1 PE=2 SV=2                                       |
| 41                          | sp Q66K08 CILP1_MOUSE    | Cartilage intermediate layer protein 1 OS=Mus musculus GN=Cilp PE=2 SV=1                          |
| 42                          | sp Q6NZ12 PTRF_HUMAN     | Polymerase I and transcript release factor OS=Homo sapiens GN=PTRF PE=1 SV=1                      |
| 43                          | sp Q75094 SLIT3_HUMAN    | Slit homolog 3 protein OS=Homo sapiens GN=SLIT3 PE=2 SV=2                                         |
| 44                          | sp Q6P9T8 TBB2C_RAT      | Tubulin beta-2C chain OS=Rattus norvegicus GN=Tubb2c PE=1 SV=1                                    |
| 45                          | sp P19858 LDHA_BOVIN     | L-lactate dehydrogenase A chain OS=Bos taurus GN=LDHA PE=2 SV=2                                   |
| 46                          | sp Q75369 FLNB_HUMAN     | Filamin-B OS=Homo sapiens GN=FLNB PE=1 SV=2                                                       |
| 47                          | sp P08059 G6PI_PIG       | Glucose-6-phosphate isomerase OS=Sus scrofa GN=GPI PE=1 SV=3                                      |
| 48                          | sp Q727G0 TARSH_HUMAN    | Target of Nesh-SH3 OS=Homo sapiens GN=ABI3BP PE=1 SV=1                                            |
| 49                          | sp P02751 FINC_HUMAN     | Fibronectin OS=Homo sapiens GN=FN1 PE=1 SV=4                                                      |
| 50                          | sp Q16851 UGPA_HUMAN     | UTP--glucose-1-phosphate uridylyltransferase OS=Homo sapiens GN=UGP2 PE=1 SV=5                    |
| 51                          | sp Q28381 HPLN1_HORSE    | Hyaluronan and proteoglycan link protein 1 OS=Equus caballus GN=HAPLN1 PE=2 SV=1                  |
| 52                          | sp Q71U36 TBA1A_HUMAN    | Tubulin alpha-1A chain OS=Homo sapiens GN=TUBA1A PE=1 SV=1                                        |
| 53                          | sp P10412 H14_HUMAN      | Histone H1.4 OS=Homo sapiens GN=HIST1H1E PE=1 SV=2                                                |
| 54                          | sp P18649 APOE_CANFA     | Apolipoprotein E OS=Canis familiaris GN=APOE PE=1 SV=2                                            |
| 55                          | sp Q66RN5 EF1A1_FELCA    | Elongation factor 1-alpha 1 OS=Felis catus GN=EEF1A1 PE=2 SV=1                                    |
| 56                          | sp Q02678 PGS1_CANFA     | Biglycan OS=Canis familiaris GN=BGN PE=2 SV=1                                                     |
| 57                          | sp Q10758 K2C8_RAT       | Keratin, type II cytoskeletal 8 OS=Rattus norvegicus GN=Krt8 PE=1 SV=3                            |
| 58                          | sp Q71U34 HSP7C_SAGOE    | Heat shock cognate 71 kDa protein OS=Saguinus oedipus GN=HSPA8 PE=2 SV=1                          |
| 59                          | sp P05124 KCRB_CANFA     | Creatine kinase B-type OS=Canis familiaris GN=CKB PE=1 SV=1                                       |
| 60                          | sp Q2PFV7 ACTN1_MACFA    | Alpha-actinin-1 OS=Macaca fascicularis GN=ACTN1 PE=2 SV=1                                         |
| 61                          | sp P49822 ALBU_CANFA     | Serum albumin OS=Canis familiaris GN=ALB PE=1 SV=3                                                |
| 62                          | sp P31404 VATA_BOVIN     | V-type proton ATPase catalytic subunit A OS=Bos taurus GN=ATP6V1A PE=2 SV=2                       |
| 63                          | sp P23528 COF1_HUMAN     | Cofilin-1 OS=Homo sapiens GN=CFL1 PE=1 SV=3                                                       |
| 64                          | sp P29361 14332_SHEEP    | 14-3-3 protein zeta/delta OS=Ovis aries GN=YWHAZ PE=1 SV=1                                        |
| 65                          | sp P12109 CO6A1_HUMAN    | Collagen alpha-1(VI) chain OS=Homo sapiens GN=COL6A1 PE=1 SV=3                                    |
| 66                          | sp Q68B18 OLML2B_HUMAN   | Olfactomedin-like protein 2B OS=Homo sapiens GN=OLFML2B PE=2 SV=2                                 |
| 67                          | sp P07900-2 HSP90A_HUMAN | Isoform HSP90AA1-2 of Heat shock protein HSP 90-alpha OS=Homo sapiens GN=HSP90AA1                 |
| 68                          | sp P38486 LEG3_CANFA     | Galectin-3 OS=Canis familiaris GN=LGALS3 PE=1 SV=3                                                |
| 69                          | sp Q63279 K1C19_RAT      | Keratin, type I cytoskeletal 19 OS=Rattus norvegicus GN=Krt19 PE=1 SV=2                           |
| 70                          | sp P48678 LMNA_MOUSE     | Lamin-A/C OS=Mus musculus GN=Lmna PE=1 SV=2                                                       |

|     |                         |                                                                                                          |
|-----|-------------------------|----------------------------------------------------------------------------------------------------------|
| 71  | sp P98160 PGBM_HUMAN    | Basement membrane-specific heparan sulfate proteoglycan core protein OS=Homo sapiens GN=HSPG2 PE=1 SV=3  |
| 72  | sp P42929 HSPB1_CANFA   | Heat shock protein beta-1 OS=Canis familiaris GN=HSPB1 PE=2 SV=1                                         |
| 73  | sp P60526 HBB_CHRRB     | Hemoglobin subunit beta OS=Chrysocony brachyurus GN=HBB PE=1 SV=1                                        |
| 74  | sp P18206 VINC_HUMAN    | Vinculin OS=Homo sapiens GN=VCL PE=1 SV=4                                                                |
| 75  | sp Q3Y1X4 PEBP1_CANFA   | Phosphatidylethanolamine-binding protein 1 OS=Canis familiaris GN=PEBP1 PE=1 SV=1                        |
| 76  | sp P47856 GFPT1_MOUSE   | Glucosamine-fructose-6-phosphate aminotransferase [isomerizing] 1 OS=Mus musculus GN=Gfpt1 PE=1 SV=3     |
| 77  | sp P02510 CRYAB_BOVIN   | Alpha-crystallin B chain OS=Bos taurus GN=CRYAB PE=1 SV=2                                                |
| 78  | sp Q9R118 HTRA1_MOUSE   | Serine protease HTRA1 OS=Mus musculus GN=Htra1 PE=2 SV=1                                                 |
| 79  | sp Q77834 PRDX6_BOVIN   | Peroxiredoxin-6 OS=Bos taurus GN=PRDX6 PE=1 SV=3                                                         |
| 80  | sp P21333 FLNA_HUMAN    | Filamin-A OS=Homo sapiens GN=FLNA PE=1 SV=4                                                              |
| 81  | sp Q9EPW4 CLC3A_MOUSE   | C-type lectin domain family 3 member A OS=Mus musculus GN=Clec3a PE=2 SV=1                               |
| 82  | sp P51884 LUM_HUMAN     | Lumican OS=Homo sapiens GN=LUM PE=1 SV=2                                                                 |
| 83  | sp Q9J1M9-2 PRG4_MOUSE  | Isoform B of Proteoglycan 4 OS=Mus musculus GN=PrG4                                                      |
| 84  | sp Q32524 COBA2_BOVIN   | Collagen alpha-2(XI) chain OS=Bos taurus GN=COL11A2 PE=3 SV=1                                            |
| 85  | sp P60530 HBA_CANLA     | Hemoglobin subunit alpha OS=Canis latrans GN=HBA PE=1 SV=2                                               |
| 86  | sp P81709 LYSC2_CANFA   | Lysozyme C, spleen isozyme OS=Canis familiaris PE=1 SV=1                                                 |
| 87  | sp P13608 PGCA_BOVIN    | Aggrecan core protein OS=Bos taurus GN=ACAN PE=1 SV=3                                                    |
| 88  | sp P53396 ACLY_HUMAN    | ATP-citrate synthase OS=Homo sapiens GN=ACLY PE=1 SV=3                                                   |
| 89  | sp Q3ZB28 STIP1_BOVIN   | Stress-induced-phosphoprotein 1 OS=Bos taurus GN=STIP1 PE=2 SV=1                                         |
| 90  | sp P12110 CO6A2_HUMAN   | Collagen alpha-2(VI) chain OS=Homo sapiens GN=COL6A2 PE=1 SV=4                                           |
| 91  | sp Q5R823 EF2_PONAB     | Elongation factor 2 OS=Pongo abelii GN=EEF2 PE=2 SV=3                                                    |
| 92  | sp P00918 CAH2_HUMAN    | Carbonic anhydrase 2 OS=Homo sapiens GN=CA2 PE=1 SV=2                                                    |
| 93  | sp P07093 GDN_HUMAN     | Glia-derived nexin OS=Homo sapiens GN=SERPINE2 PE=1 SV=1                                                 |
| 94  | sp Q64610 ENPP2_RAT     | Ectonucleotide pyrophosphatase/phosphodiesterase family member 2 OS=Rattus norvegicus GN=Enpp2 PE=1 SV=2 |
| 95  | sp Q99497 PARK7_HUMAN   | Protein DJ-1 OS=Homo sapiens GN=PARK7 PE=1 SV=2                                                          |
| 96  | sp Q6T308 GLGB_FELCA    | 1,4-alpha-glucan-branching enzyme OS=Felis catus GN=GBE1 PE=2 SV=1                                       |
| 97  | sp Q9H4F8-2 SMOC1_HUMAN | Isoform 2 of SPARC-related modular calcium-binding protein 1 OS=Homo sapiens GN=SMOC1                    |
| 98  | sp P62992 RS27A_BOVIN   | Ubiquitin-40S ribosomal protein S27a OS=Bos taurus GN=RS27A PE=1 SV=2                                    |
| 99  | sp P00761 TRYP_PIG      | Trypsin OS=Sus scrofa PE=1 SV=1                                                                          |
| 100 | sp Q9GKN8 PRELP_BOVIN   | Prolargin OS=Bos taurus GN=PRELP PE=2 SV=1                                                               |
| 101 | sp Q00394 A1AT_CERAE    | Alpha-1-antitrypsin (Fragment) OS=Cercopithecus aethiops GN=SERPINA1 PE=2 SV=1                           |
| 102 | sp Q7YQD7 FBLN3_MACFA   | EGF-containing fibulin-like extracellular matrix protein 1 OS=Macaca fascicularis GN=EFEMP1 PE=2 SV=1    |
| 103 | sp P19803 GDIR1_BOVIN   | Rho GDP-dissociation inhibitor 1 OS=Bos taurus GN=ARHGDI1 PE=1 SV=3                                      |
| 104 | sp P06396 GELS_HUMAN    | Gelsolin OS=Homo sapiens GN=GSN PE=1 SV=1                                                                |
| 105 | sp P58771-2 TPM1_MOUSE  | Isoform Fibroblast of Tropomyosin alpha-1 chain OS=Mus musculus GN=Tpm1                                  |
| 106 | sp Q5R7K9 EDIL3_PONAB   | EGF-like repeat and discoidin 1-like domain-containing protein 3 OS=Pongo abelii GN=EDIL3 PE=2 SV=1      |
| 107 | sp P50609 FMOD_RAT      | Fibromodulin OS=Rattus norvegicus GN=Fmod PE=2 SV=1                                                      |
| 108 | sp Q7YRU4 MDHC_FELCA    | Malate dehydrogenase, cytoplasmic OS=Felis catus GN=MDH1 PE=2 SV=3                                       |
| 109 | sp P11980-2 KPYM_RAT    | Isoform M2 of Pyruvate kinase isozymes M1/M2 OS=Rattus norvegicus GN=Pkm2                                |
| 110 | sp Q0VCX2 GRP78_BOVIN   | 78 kDa glucose-regulated protein OS=Bos taurus GN=HSPA5 PE=2 SV=1                                        |
| 111 | sp Q97555 GDIA_CANFA    | Rab GDP dissociation inhibitor alpha OS=Canis familiaris GN=GDII1 PE=2 SV=1                              |
| 112 | sp Q92954-2 PRG4_HUMAN  | Isoform B of Proteoglycan 4 OS=Homo sapiens GN=PRG4                                                      |
| 113 | sp Q99536 VAT1_HUMAN    | Synaptic vesicle membrane protein VAT-1 homolog OS=Homo sapiens GN=VAT1 PE=1 SV=2                        |
| 114 | sp P62262 1433E_SHEEP   | 14-3-3 protein epsilon OS=Ovis aries GN=YWHA6 PE=1 SV=1                                                  |
| 115 | sp Q68FD5 CLH_MOUSE     | Clathrin heavy chain 1 OS=Mus musculus GN=Cltc PE=1 SV=3                                                 |
| 116 | sp Q5R4B4 NP11_PONAB    | Nucleosome assembly protein 1-like 1 OS=Pongo abelii GN=NAP11L1 PE=2 SV=1                                |
| 117 | sp P24821 TENA_HUMAN    | Tenascin OS=Homo sapiens GN=TNC PE=1 SV=3                                                                |
| 118 | sp P23352 KALM_HUMAN    | Anosmin-1 OS=Homo sapiens GN=KAL1 PE=1 SV=3                                                              |
| 119 | sp Q63355 MYO1C_RAT     | Myosin-1c OS=Rattus norvegicus GN=Myo1c PE=2 SV=2                                                        |
| 120 | sp Q9XSA7 CLIC4_BOVIN   | Chloride intracellular channel protein 4 OS=Bos taurus GN=CLIC4 PE=2 SV=3                                |
| 121 | sp P12107-2 COBA1_HUMAN | Isoform B of Collagen alpha-1(XI) chain OS=Homo sapiens GN=COL11A1                                       |
| 122 | sp Q50KA8 NDKB_CANFA    | Nucleoside diphosphate kinase B OS=Canis familiaris GN=NME2 PE=2 SV=1                                    |
| 123 | sp P79385 MFGM_PIG      | Lactadherin OS=Sus scrofa GN=MFG6E PE=1 SV=2                                                             |
| 124 | sp P52907 CAZA1_HUMAN   | F-actin-capping protein subunit alpha-1 OS=Homo sapiens GN=CAPZA1 PE=1 SV=3                              |
| 125 | sp P53534 PYGB_RAT      | Glycogen phosphorylase, brain form (Fragment) OS=Rattus norvegicus GN=Pygb PE=1 SV=3                     |
| 126 | sp Q5R9X1 CADH2_PONAB   | Cadherin-2 OS=Pongo abelii GN=CDH2 PE=2 SV=1                                                             |
| 127 | sp Q8R1M2 H2AJ_MOUSE    | Histone H2A.J OS=Mus musculus GN=H2afj PE=2 SV=1                                                         |
| 128 | sp A3KMV5 UBA1_BOVIN    | Ubiquitin-like modifier-activating enzyme 1 OS=Bos taurus GN=UBA1 PE=2 SV=1                              |
| 129 | sp Q5RCP8 H2B2E_PONAB   | Histone H2B type 2-E OS=Pongo abelii GN=HIST2H2BE PE=2 SV=3                                              |
| 130 | sp P31836 NCAM1_BOVIN   | Neural cell adhesion molecule 1 OS=Bos taurus GN=NCAM1 PE=1 SV=1                                         |
| 131 | sp P01023 AZMG_HUMAN    | Alpha-2-macroglobulin OS=Homo sapiens GN=AZM PE=1 SV=2                                                   |
| 132 | sp P52209 PGD_HUMAN     | 6-phosphogluconate dehydrogenase, decarboxylating OS=Homo sapiens GN=PGD PE=1 SV=3                       |
| 133 | sp P48616 VIME_BOVIN    | Vimentin OS=Bos taurus GN=VIM PE=1 SV=3                                                                  |
| 134 | sp Q8IUJ8 CILP2_HUMAN   | Cartilage intermediate layer protein 2 OS=Homo sapiens GN=CILP2 PE=2 SV=2                                |
| 135 | sp Q9UKZ9 PCOC2_HUMAN   | Procollagen C-endopeptidase enhancer 2 OS=Homo sapiens GN=PCOLCE2 PE=1 SV=1                              |
| 136 | sp P00450 CERU_HUMAN    | Ceruloplasmin OS=Homo sapiens GN=CP PE=1 SV=1                                                            |
| 137 | sp P33724 CAV1_CANFA    | Caveolin-1 OS=Canis familiaris GN=CAV1 PE=1 SV=1                                                         |
| 138 | sp P51662 ANXA1_RABIT   | Annexin A1 OS=Oryctolagus cuniculus GN=ANXA1 PE=1 SV=1                                                   |
| 139 | sp Q5RCS7 H4_PONAB      | Histone H4 OS=Pongo abelii PE=3 SV=1                                                                     |
| 140 | sp Q3ZBT1 TERA_BOVIN    | Transitional endoplasmic reticulum ATPase OS=Bos taurus GN=VCP PE=1 SV=1                                 |
| 141 | sp P05786 K2C8_BOVIN    | Keratin, type II cytoskeletal 8 OS=Bos taurus GN=KRT8 PE=2 SV=3                                          |
| 142 | sp P35445 COMP_BOVIN    | Cartilage oligomeric matrix protein OS=Bos taurus GN=COMP PE=1 SV=2                                      |
| 143 | sp P17183 ENOG_MOUSE    | Gamma-enolase OS=Mus musculus GN=Eno2 PE=1 SV=2                                                          |
| 144 | sp Q46379 LUM_RABIT     | Lumican (Fragment) OS=Oryctolagus cuniculus GN=LUM PE=2 SV=1                                             |
| 145 | sp Q5R1X4 ALDOC_PANTR   | Fructose-bisphosphate aldolase C OS=Pan troglodytes GN=ALDOC PE=2 SV=3                                   |
| 146 | sp Q9TS87 TAGL_BOVIN    | Transgelin OS=Bos taurus GN=TAGLN PE=1 SV=4                                                              |
| 147 | sp Q62644 LECT2_BOVIN   | Leukocyte cell-derived chemotaxin-2 OS=Bos taurus GN=LECT2 PE=1 SV=1                                     |
| 148 | sp Q7LGC8 CHST3_HUMAN   | Carbohydrate sulfotransferase 3 OS=Homo sapiens GN=CHST3 PE=1 SV=3                                       |
| 149 | sp Q6YNX6 CALM_SHEEP    | Calmodulin OS=Ovis aries GN=CALM2 PE=2 SV=3                                                              |
| 150 | sp P53601-2 A4_MACFA    | Isoform APP695 of Amyloid beta A4 protein OS=Macaca fascicularis GN=APP                                  |
| 151 | sp Q8HZQ5 EZRI_RABIT    | Ezrin OS=Oryctolagus cuniculus GN=EZR PE=1 SV=3                                                          |
| 152 | sp P80895 PIMT_PIG      | Protein-L-isoaspartate(D-aspartate) O-methyltransferase OS=Sus scrofa GN=PCMT1 PE=1 SV=3                 |
| 153 | sp Q13642-1 FHL1_HUMAN  | Isoform SLIM1 of Four and a half LIM domains protein 1 OS=Homo sapiens GN=FHL1                           |
| 154 | sp P54652 HSP72_HUMAN   | Heat shock-related 70 kDa protein 2 OS=Homo sapiens GN=HSPA2 PE=1 SV=1                                   |
| 155 | sp P62815 VATB2_RAT     | V-type proton ATPase subunit B, brain isoform OS=Rattus norvegicus GN=Atp6v1b2 PE=1 SV=1                 |
| 156 | sp Q5IS74 TPP1_PANTR    | Tripeptidyl-peptidase 1 OS=Pan troglodytes GN=TPP1 PE=2 SV=1                                             |
| 157 | sp Q64119 MYL6_RAT      | Myosin light polypeptide 6 OS=Rattus norvegicus GN=Myf6 PE=1 SV=3                                        |
| 158 | sp Q710C4 SAHH_PIG      | Adenosylhomocysteinease OS=Sus scrofa GN=AHCY PE=3 SV=3                                                  |
| 159 | sp P50994 ANXA4_CANFA   | Annexin A4 OS=Canis familiaris GN=ANXA4 PE=1 SV=2                                                        |
| 160 | sp Q55226 CHAD_MOUSE    | Chondroadherin OS=Mus musculus GN=Chad PE=2 SV=1                                                         |

|     |                        |                                                                                                                        |
|-----|------------------------|------------------------------------------------------------------------------------------------------------------------|
| 161 | sp P14141 CAH3_RAT     | Carbonic anhydrase 3 OS=Rattus norvegicus GN=Ca3 PE=1 SV=3                                                             |
| 162 | sp Q8WNN6 SODC_CANFA   | Superoxide dismutase [Cu-Zn] OS=Canis familiaris GN=SOD1 PE=2 SV=1                                                     |
| 163 | sp Q13126 MTAP_HUMAN   | S-methyl-5'-thioadenosine phosphorylase OS=Homo sapiens GN=MTAP PE=1 SV=2                                              |
| 164 | sp Q5R859 K1C19_PONAB  | Keratin, type I cytoskeletal 19 OS=Pongo abelii GN=KRT19 PE=2 SV=1                                                     |
| 165 | sp P11276 FINC_MOUSE   | Fibronectin OS=Mus musculus GN=Fn1 PE=1 SV=3                                                                           |
| 166 | sp P05783 K1C18_HUMAN  | Keratin, type I cytoskeletal 18 OS=Homo sapiens GN=KRT18 PE=1 SV=2                                                     |
| 167 | sp Q2PF23 PRDX2_MACFA  | Peroxiredoxin-2 OS=Macaca fascicularis GN=PRDX2 PE=2 SV=3                                                              |
| 168 | sp Q5R8R1 ARP3_PONAB   | Actin-related protein 3 OS=Pongo abelii GN=ACTR3 PE=2 SV=3                                                             |
| 169 | sp P56480 ATPB_MOUSE   | ATP synthase subunit beta, mitochondrial OS=Mus musculus GN=Atp5b PE=1 SV=2                                            |
| 170 | sp Q8HZQ0 RNAS4_PANTR  | Ribonuclease 4 OS=Pan troglodytes GN=RNASE4 PE=3 SV=1                                                                  |
| 171 | sp Q5REN2 PSA1_PONAB   | Proteasome subunit alpha type-1 OS=Pongo abelii GN=PSMA1 PE=2 SV=1                                                     |
| 172 | sp Q28008 CLC3A_BOVIN  | C-type lectin domain family 3 member A OS=Bos taurus GN=CLEC3A PE=2 SV=1                                               |
| 173 | sp Q9H299 SH3L3_HUMAN  | SH3 domain-binding glutamic acid-rich-like protein 3 OS=Homo sapiens GN=SH3BGL3 PE=1 SV=1                              |
| 174 | sp P076041 NEBL_HUMAN  | Nebulette OS=Homo sapiens GN=NEBL PE=2 SV=1                                                                            |
| 175 | sp Q9Y490 TLN1_HUMAN   | Talin-1 OS=Homo sapiens GN=TLN1 PE=1 SV=3                                                                              |
| 176 | sp Q5R4C1 TKT_PONAB    | Transketolase OS=Pongo abelii GN=TKT PE=2 SV=1                                                                         |
| 177 | sp A1A41 K6PL_BOVIN    | 6-phosphofructokinase, liver type OS=Bos taurus GN=PFKL PE=2 SV=1                                                      |
| 178 | sp A507R1 TR11B_BOVIN  | Tumor necrosis factor receptor superfamily member 11B OS=Bos taurus GN=TNFRSF11B PE=2 SV=1                             |
| 179 | sp P13697 MAOX_RAT     | NADP-dependent malic enzyme OS=Rattus norvegicus GN=Me1 PE=1 SV=2                                                      |
| 180 | sp P02459 CO2A1_BOVIN  | Collagen alpha-1(I) chain (Fragments) OS=Bos taurus GN=COL2A1 PE=1 SV=3                                                |
| 181 | sp P13942 COBA2_HUMAN  | Collagen alpha-2(XI) chain OS=Homo sapiens GN=COL11A2 PE=1 SV=4                                                        |
| 182 | sp P80928 MIF_PIG      | Macrophage migration inhibitory factor OS=Sus scrofa GN=MIF PE=1 SV=3                                                  |
| 183 | sp Q4R5F2 LGLU_MACFA   | Lactylglutathione lyase OS=Macaca fascicularis GN=GLO1 PE=2 SV=3                                                       |
| 184 | sp P08729 K2C7_HUMAN   | Keratin, type II cytoskeletal 7 OS=Homo sapiens GN=KRT7 PE=1 SV=4                                                      |
| 185 | sp Q2TBQ8 6PGL_BOVIN   | 6-phosphogluconolactonase OS=Bos taurus GN=PGLS PE=2 SV=1                                                              |
| 186 | sp Q6VHK3 CD109_HUMAN  | CD109 antigen OS=Homo sapiens GN=CD109 PE=1 SV=2                                                                       |
| 187 | sp Q9QP5 PRELP_RAT     | Prolargin OS=Rattus norvegicus GN=Prelp PE=2 SV=1                                                                      |
| 188 | sp Q6RUV5 RAC1_RAT     | Ras-related C3 botulinum toxin substrate 1 OS=Rattus norvegicus GN=Rac1 PE=1 SV=1                                      |
| 189 | sp Q95340 PAPS2_HUMAN  | Bifunctional 3'-phosphoadenosine 5'-phosphosulfate synthase 2 OS=Homo sapiens GN=PAPSS2 PE=1 SV=2                      |
| 190 | sp P20112 SPRC_PIG     | SPARC OS=Sus scrofa GN=SPARC PE=1 SV=2                                                                                 |
| 191 | sp Q91V12 PRDBP_MOUSE  | Protein kinase C delta-binding protein OS=Mus musculus GN=Prckdbp PE=1 SV=1                                            |
| 192 | sp Q7JUJ6 TBB5_PANTR   | Tubulin beta chain OS=Pan troglodytes GN=TUBB PE=3 SV=1                                                                |
| 193 | sp P20618 PSB1_HUMAN   | Proteasome subunit beta type-1 OS=Homo sapiens GN=PSMB1 PE=1 SV=2                                                      |
| 194 | sp Q7SIB7 PGK1_PIG     | Phosphoglycerate kinase 1 OS=Sus scrofa GN=PGK1 PE=1 SV=3                                                              |
| 195 | sp Q5R1W0 ANXA5_PANTR  | Annexin A5 OS=Pan troglodytes GN=ANXA5 PE=2 SV=3                                                                       |
| 196 | sp P06733 ENO4_HUMAN   | Alpha-enolase OS=Homo sapiens GN=ENO1 PE=1 SV=2                                                                        |
| 197 | sp P07451 CAH3_HUMAN   | Carbonic anhydrase 3 OS=Homo sapiens GN=CA3 PE=1 SV=3                                                                  |
| 198 | sp Q61792 LASP1_MOUSE  | LIM and SH3 domain protein 1 OS=Mus musculus GN=Lasp1 PE=1 SV=1                                                        |
| 199 | sp P05114 HMGN1_HUMAN  | Non-histone chromosomal protein HMG-14 OS=Homo sapiens GN=HMGN1 PE=1 SV=3                                              |
| 200 | sp Q5SRC20 1433G_PONAB | 14-3-3 protein gamma OS=Pongo abelii GN=YWHAG PE=2 SV=3                                                                |
| 201 | sp Q66H80 COPD_RAT     | Coatomer subunit delta OS=Rattus norvegicus GN=Arcn1 PE=2 SV=1                                                         |
| 202 | sp Q11011 PSA_MOUSE    | Puromycin-sensitive aminopeptidase OS=Mus musculus GN=Npepps PE=1 SV=2                                                 |
| 203 | sp P11679 K2C8_MOUSE   | Keratin, type II cytoskeletal 8 OS=Mus musculus GN=Krt8 PE=1 SV=4                                                      |
| 204 | sp P02639 S10A1_BOVIN  | Protein S100-A1 OS=Bos taurus GN=S100A1 PE=1 SV=2                                                                      |
| 205 | sp Q29443 TRFE_BOVIN   | Serotransferrin OS=Bos taurus GN=TF PE=2 SV=1                                                                          |
| 206 | sp Q8VHK6 FLNC_MOUSE   | Filamin-C OS=Mus musculus GN=Flnc PE=1 SV=3                                                                            |
| 207 | sp Q76M96 CCD80_HUMAN  | Coiled-coil domain-containing protein 80 OS=Homo sapiens GN=CCDC80 PE=1 SV=1                                           |
| 208 | sp Q9POL0 VAPA_HUMAN   | Vesicle-associated membrane protein-associated protein A OS=Homo sapiens GN=VAPA PE=1 SV=3                             |
| 209 | sp P13355 GTR1_RABIT   | Solute carrier family 2, facilitated glucose transporter member 1 OS=Oryctolagus cuniculus GN=SLC2A1 PE=2 SV=1         |
| 210 | sp Q62159 RHO_C_MOUSE  | Rho-related GTP-binding protein RhoC OS=Mus musculus GN=Rhoc PE=1 SV=2                                                 |
| 211 | sp Q08529 CAN2_MOUSE   | Calpain-2 catalytic subunit OS=Mus musculus GN=Capn2 PE=2 SV=4                                                         |
| 212 | sp Q9TQX6 ACBP_CANFA   | Acyl-CoA-binding protein OS=Canis familiaris GN=DBI PE=1 SV=2                                                          |
| 213 | sp P40227 TCPZ_HUMAN   | T-complex protein 1 subunit zeta OS=Homo sapiens GN=CTC6A PE=1 SV=3                                                    |
| 214 | sp Q5RBU8 ROA2_PONAB   | Heterogeneous nuclear ribonucleoproteins A2/B1 OS=Pongo abelii GN=HNRNPA2B1 PE=2 SV=1                                  |
| 215 | sp Q8BG05 ROA3_MOUSE   | Heterogeneous nuclear ribonucleoprotein A3 OS=Mus musculus GN=Hnrnpa3 PE=1 SV=1                                        |
| 216 | sp Q5RER0 ITIHS_PONAB  | Inter-alpha-trypsin inhibitor heavy chain H5 OS=Pongo abelii GN=ITIHS PE=2 SV=1                                        |
| 217 | sp Q8R491 EHD3_RAT     | EH domain-containing protein 3 OS=Rattus norvegicus GN=Ehd3 PE=1 SV=2                                                  |
| 218 | sp Q00612 G6PD1_MOUSE  | Glucose-6-phosphate 1-dehydrogenase X OS=Mus musculus GN=G6pdx PE=1 SV=3                                               |
| 219 | sp P79136 CAP2B_BOVIN  | F-actin-capping protein subunit beta OS=Bos taurus GN=CAP2B PE=1 SV=1                                                  |
| 220 | sp Q76M23 ZAAA_MOUSE   | Serine/threonine-protein phosphatase 2A 65 kDa regulatory subunit A alpha isoform OS=Mus musculus GN=Ppp2r1a PE=1 SV=3 |
| 221 | sp P06151 LDHA_MOUSE   | L-lactate dehydrogenase A chain OS=Mus musculus GN=Ldha PE=1 SV=3                                                      |
| 222 | sp Q9GKX8 H590B_HORSE  | Heat shock protein HSP 90-beta OS=Equus caballus GN=HSP90AB1 PE=2 SV=3                                                 |
| 223 | sp Q6SQH4 S10AA_RABIT  | Protein S100-A10 OS=Oryctolagus cuniculus GN=S100A10 PE=3 SV=3                                                         |
| 224 | sp Q76I81 RS12_BOVIN   | 40S ribosomal protein S12 OS=Bos taurus GN=RP512 PE=2 SV=1                                                             |
| 225 | sp A7MB70 SEM3C_BOVIN  | Semaphorin-3C OS=Bos taurus GN=SEMA3C PE=2 SV=1                                                                        |
| 226 | sp Q9Z1N5 UAP56_MOUSE  | Spliceosome RNA helicase Bat1 OS=Mus musculus GN=Bat1 PE=1 SV=1                                                        |
| 227 | sp P82460 THIO_PIG     | Thioredoxin OS=Sus scrofa GN=TXN PE=1 SV=3                                                                             |
| 228 | sp Q92743 HTRA1_HUMAN  | Serine protease HTRA1 OS=Homo sapiens GN=HTRA1 PE=1 SV=1                                                               |
| 229 | sp P04937-2 FINC_RAT   | Isoform FNIII-13-less of Fibronectin OS=Rattus norvegicus GN=Fn1                                                       |
| 230 | sp P09488 GSTM1_HUMAN  | Glutathione S-transferase Mu 1 OS=Homo sapiens GN=GSTM1 PE=1 SV=3                                                      |
| 231 | sp P07737 PROF1_HUMAN  | Profilin-1 OS=Homo sapiens GN=PFN1 PE=1 SV=2                                                                           |
| 232 | sp Q4R502 IDHP_MACFA   | Isocitrate dehydrogenase [NADP], mitochondrial OS=Macaca fascicularis GN=IDH2 PE=2 SV=1                                |
| 233 | sp Q27972 CHAD_BOVIN   | Chondroadherin OS=Bos taurus GN=CHAD PE=1 SV=1                                                                         |
| 234 | sp Q5R5F0 LDHA_PONAB   | L-lactate dehydrogenase A chain OS=Pongo abelii GN=LDHA PE=2 SV=3                                                      |
| 235 | sp P19001 K1C19_MOUSE  | Keratin, type I cytoskeletal 19 OS=Mus musculus GN=Krt19 PE=2 SV=1                                                     |
| 236 | sp P16403 H12_HUMAN    | Histone H1.2 OS=Homo sapiens GN=HIST1H1C PE=1 SV=2                                                                     |
| 237 | sp P45591 COF2_MOUSE   | Cofilin-2 OS=Mus musculus GN=Cf2 PE=1 SV=1                                                                             |
| 238 | sp Q8CIB5 FERM2_MOUSE  | Fermitin family homolog 2 OS=Mus musculus GN=Fermt2 PE=1 SV=1                                                          |
| 239 | sp Q9Z2K9 IDHC_MICME   | Isocitrate dehydrogenase [NADP] cytoplasmic OS=Microtus mexicanus GN=IDH1 PE=2 SV=1                                    |
| 240 | sp Q5E9E6 RL10A_BOVIN  | 60S ribosomal protein L10a OS=Bos taurus GN=RPL10A PE=2 SV=3                                                           |
| 241 | sp P12830 CADH1_HUMAN  | Cadherin-1 OS=Homo sapiens GN=CDH1 PE=1 SV=3                                                                           |
| 242 | sp P28075 PSB5_RAT     | Proteasome subunit beta type-5 OS=Rattus norvegicus GN=Psmb5 PE=1 SV=3                                                 |
| 243 | sp Q8CFN2 CDC42_RAT    | Cell division control protein 42 homolog OS=Rattus norvegicus GN=Cdc42 PE=1 SV=2                                       |
| 244 | sp P08294 SODE_HUMAN   | Extracellular superoxide dismutase [Cu-Zn] OS=Homo sapiens GN=SOD3 PE=1 SV=2                                           |
| 245 | sp Q3ZBD7 G6PI_BOVIN   | Glucose-6-phosphate isomerase OS=Bos taurus GN=GPI PE=2 SV=3                                                           |
| 246 | sp Q14816 ARPC4_BOVIN  | Actin-related protein 2/3 complex subunit 4 OS=Bos taurus GN=ARPC4 PE=1 SV=3                                           |
| 247 | sp O00300 TR11B_HUMAN  | Tumor necrosis factor receptor superfamily member 11B OS=Homo sapiens GN=TNFRSF11B PE=1 SV=2                           |
| 248 | sp P50503 F10A1_RAT    | Hsc70-interacting protein OS=Rattus norvegicus GN=St13 PE=1 SV=1                                                       |
| 249 | sp Q5R514 UBE2L3_PONAB | Ubiquitin-conjugating enzyme E2 L3 OS=Pongo abelii GN=UBE2L3 PE=2 SV=1                                                 |
| 250 | sp Q9D0M5 DYL2_MOUSE   | Dynein light chain 2, cytoplasmic OS=Mus musculus GN=Dynll2 PE=1 SV=1                                                  |
| 251 | sp P21741 MK_HUMAN     | Midkine OS=Homo sapiens GN=MDK PE=1 SV=1                                                                               |

|     |                         |                                                                                                            |
|-----|-------------------------|------------------------------------------------------------------------------------------------------------|
| 252 | sp P50518 VATE1_MOUSE   | V-type proton ATPase subunit E 1 OS=Mus musculus GN=Atp6v1e1 PE=1 SV=2                                     |
| 253 | sp Q9TTY1 TIMP2_CANFA   | Metalloproteinase inhibitor 2 OS=Canis familiaris GN=TIMP2 PE=2 SV=2                                       |
| 254 | sp Q71LE2 H33_PIG       | Histone H3.3 OS=Sus scrofa GN=H3F3A PE=2 SV=3                                                              |
| 255 | sp P55918 MFAP4_BOVIN   | Microfibril-associated glycoprotein 4 OS=Bos taurus GN=MFAP4 PE=1 SV=2                                     |
| 256 | sp Q5RK11 IF4A2_RAT     | Eukaryotic initiation factor 4A-II OS=Rattus norvegicus GN=EIF4a2 PE=1 SV=1                                |
| 257 | sp Q86Y38 XYLT1_HUMAN   | Xylosyltransferase 1 OS=Homo sapiens GN=XYLT1 PE=1 SV=1                                                    |
| 258 | sp Q15149-4 PLEC_HUMAN  | Isoform Plectin-11 of Plectin OS=Homo sapiens GN=PLEC                                                      |
| 259 | sp Q6EWQ7 IF5A1_BOVIN   | Eukaryotic translation initiation factor 5A-1 OS=Bos taurus GN=EIF5A PE=2 SV=3                             |
| 260 | sp Q9TV56 S10A4_CANFA   | Protein S100-A4 OS=Canis familiaris GN=S100A4 PE=3 SV=1                                                    |
| 261 | sp Q29116 TENA_PIG      | Tenascin OS=Sus scrofa GN=TNC PE=1 SV=1                                                                    |
| 262 | sp Q865V6 CAPG_BOVIN    | Macrophage-capping protein OS=Bos taurus GN=CAPG PE=2 SV=1                                                 |
| 263 | sp Q75083 WDR1_HUMAN    | WD repeat-containing protein 1 OS=Homo sapiens GN=WDR1 PE=1 SV=4                                           |
| 264 | sp Q2EN75 S10A6_PIG     | Protein S100-A6 OS=Sus scrofa GN=S100A6 PE=3 SV=1                                                          |
| 265 | sp Q60847 COCA1_MOUSE   | Collagen alpha-1(XII) chain OS=Mus musculus GN=Col12a1 PE=2 SV=3                                           |
| 266 | sp Q6UVK1 CSPG4_HUMAN   | Chondroitin sulfate proteoglycan 4 OS=Homo sapiens GN=CSPG4 PE=1 SV=2                                      |
| 267 | sp O35987 NSF1C_RAT     | NSF1 cofactor p47 OS=Rattus norvegicus GN=Nsf1c PE=1 SV=1                                                  |
| 268 | sp Q5R556 RAN_PONAB     | GTP-binding nuclear protein Ran OS=Pongo abelii GN=RAN PE=2 SV=3                                           |
| 269 | sp P31324 KAP3_MOUSE    | cAMP-dependent protein kinase type II-beta regulatory subunit OS=Mus musculus GN=Prkar2b PE=1 SV=3         |
| 270 | sp Q9H361 PABP3_HUMAN   | Polyadenylate-binding protein 3 OS=Homo sapiens GN=PABPC3 PE=1 SV=2                                        |
| 271 | sp O11780 BGH3_PIG      | Transforming growth factor-beta-induced protein ig-h3 OS=Sus scrofa GN=TGFBI PE=1 SV=1                     |
| 272 | sp Q07954 LRP1_HUMAN    | Prolow-density lipoprotein receptor-related protein 1 OS=Homo sapiens GN=LRP1 PE=1 SV=1                    |
| 273 | sp Q96J81 DYH8_HUMAN    | Dynein heavy chain 8, axonemal OS=Homo sapiens GN=DNAH8 PE=1 SV=2                                          |
| 274 | sp Q3ZC84 CNDP2_BOVIN   | Cytosolic non-specific dipeptidase OS=Bos taurus GN=CNDP2 PE=2 SV=1                                        |
| 275 | sp P51635 AK1A1_RAT     | Alcohol dehydrogenase [NADP+] OS=Rattus norvegicus GN=Akr1a1 PE=1 SV=2                                     |
| 276 | sp P97927 LAMA4_MOUSE   | Laminin subunit alpha-4 OS=Mus musculus GN=Lama4 PE=1 SV=2                                                 |
| 277 | sp Q13822-2 ENPP2_HUMAN | Isoform Alpha of Ectonucleotide pyrophosphatase/phosphodiesterase family member 2 OS=Homo sapiens GN=ENPP2 |
| 278 | sp Q03001-9 BPA1_HUMAN  | Isoform EB of Bullous pemphigoid antigen 1 OS=Homo sapiens GN=DST                                          |
| 279 | sp P11586 C1TC_HUMAN    | C-1-tetrahydrofolate synthase, cytoplasmic OS=Homo sapiens GN=MTHFD1 PE=1 SV=3                             |
| 280 | sp P14866 HNRPL_HUMAN   | Heterogeneous nuclear ribonucleoprotein L OS=Homo sapiens GN=HNRNPL PE=1 SV=2                              |
| 281 | sp Q9NRR5 OLF3_HUMAN    | Olfactomedin-like protein 3 OS=Homo sapiens GN=OLFML3 PE=2 SV=1                                            |
| 282 | sp Q4V8H8 EHD2_RAT      | EH domain-containing protein 2 OS=Rattus norvegicus GN=Ehd2 PE=1 SV=1                                      |
| 283 | sp Q7TMV8 HUWE1_MOUSE   | E3 ubiquitin-protein ligase HUWE1 OS=Mus musculus GN=Huwe1 PE=1 SV=4                                       |
| 284 | sp P00570 KAD1_BOVIN    | Adenylate kinase isoenzyme 1 OS=Bos taurus GN=AK1 PE=1 SV=2                                                |
| 285 | sp Q6P502 TCPG_RAT      | T-complex protein 1 subunit gamma OS=Rattus norvegicus GN=Cct3 PE=1 SV=1                                   |
| 286 | sp P00813 ADA_HUMAN     | Adenosine deaminase OS=Homo sapiens GN=ADA PE=1 SV=3                                                       |
| 287 | sp Q3T035 ARPC3_BOVIN   | Actin-related protein 2/3 complex subunit 3 OS=Bos taurus GN=ARPC3 PE=1 SV=3                               |
| 288 | sp P46940 IQGA1_HUMAN   | Ras GTPase-activating-like protein IQGAP1 OS=Homo sapiens GN=IQGAP1 PE=1 SV=1                              |
| 289 | sp Q9TSZ6 DAG1_CANFA    | Dystroglycan OS=Canis familiaris GN=DAG1 PE=3 SV=1                                                         |

|     |                            |                                                                                                              |
|-----|----------------------------|--------------------------------------------------------------------------------------------------------------|
| 290 | sp Q5RBG1 RAB5B_PONAB      | Ras-related protein Rab-5B OS=Pongo abelii GN=RAB5B PE=2 SV=1                                                |
| 291 | sp P70349 HINT1_MOUSE      | Histidine triad nucleotide-binding protein 1 OS=Mus musculus GN=Hint1 PE=1 SV=3                              |
| 292 | sp Q08D0P PGM1_BOVIN       | Phosphoglucosyltransferase-1 OS=Bos taurus GN=PGM1 PE=2 SV=1                                                 |
| 293 | sp Q9TUL9 TIMP3_HORSE      | Metalloproteinase inhibitor 3 OS=Equus caballus GN=TIMP3 PE=2 SV=1                                           |
| 294 | sp P49747 COMP_HUMAN       | Cartilage oligomeric matrix protein OS=Homo sapiens GN=COMP PE=1 SV=2                                        |
| 295 | sp Q5VYK3 ECM29_HUMAN      | Proteasome-associated protein ECM29 homolog OS=Homo sapiens GN=ECM29 PE=1 SV=2                               |
| 296 | sp Q63210 GNA12_RAT        | Guanine nucleotide-binding protein subunit alpha-12 OS=Rattus norvegicus GN=Gna12 PE=2 SV=3                  |
| 297 | sp P15170 ERF3A_HUMAN      | Eukaryotic peptide chain release factor GTP-binding subunit ERF3A OS=Homo sapiens GN=GSPT1 PE=1 SV=1         |
| 298 | sp P52174 NDKA1_BOVIN      | Nucleoside diphosphate kinase A 1 OS=Bos taurus GN=NME1-1 PE=1 SV=3                                          |
| 299 | sp Q4VIT4 PDIA3_CERAE      | Protein disulfide-isomerase A3 OS=Cercopithecus aethiops GN=PDIA3 PE=2 SV=1                                  |
| 300 | sp Q6AY84 SCRN1_RAT        | Secernin-1 OS=Rattus norvegicus GN=Scrn1 PE=1 SV=1                                                           |
| 301 | sp Q5E984 TCTP_BOVIN       | Translationally-controlled tumor protein OS=Bos taurus GN=TPT1 PE=2 SV=1                                     |
| 302 | sp P15311 EZRI_HUMAN       | Ezrin OS=Homo sapiens GN=EZR PE=1 SV=4                                                                       |
| 303 | sp Q9JHW0 PSB7_RAT         | Proteasome subunit beta type-7 OS=Rattus norvegicus GN=Psb7 PE=1 SV=1                                        |
| 304 | sp Q9UL16 CCD19_HUMAN      | Coiled-coil domain-containing protein 19, mitochondrial OS=Homo sapiens GN=CCDC19 PE=1 SV=2                  |
| 305 | sp Q62920 PDLI5_RAT        | PDZ and LIM domain protein 5 OS=Rattus norvegicus GN=Pdlm5 PE=1 SV=2                                         |
| 306 | sp P30044 PRDX5_HUMAN      | Peroxisiredoxin-5, mitochondrial OS=Homo sapiens GN=PRDX5 PE=1 SV=3                                          |
| 307 | sp Q9HBL0 TENS1_HUMAN      | Tensin-1 OS=Homo sapiens GN=TN51 PE=1 SV=2                                                                   |
| 308 | sp Q02809 PLOD1_HUMAN      | Procollagen-lysine,2-oxoglutarate 5-dioxygenase 1 OS=Homo sapiens GN=PLOD1 PE=1 SV=2                         |
| 309 | sp P63322 RALA_RAT         | Ras-related protein Ral-A OS=Rattus norvegicus GN=Rala PE=1 SV=1                                             |
| 310 | sp Q5RB59 PUR6_PONAB       | Multifunctional protein ADE2 OS=Pongo abelii GN=PAICS PE=2 SV=3                                              |
| 311 | sp Q86V81 THOC4_HUMAN      | THO complex subunit 4 OS=Homo sapiens GN=THOC4 PE=1 SV=3                                                     |
| 312 | sp Q9CPW4 ARPC5_MOUSE      | Actin-related protein 2/3 complex subunit 5 OS=Mus musculus GN=Arpc5 PE=2 SV=3                               |
| 313 | sp Q88I20 PCD20_MOUSE      | Protocadherin-20 OS=Mus musculus GN=Pcdh20 PE=2 SV=2                                                         |
| 314 | sp P20072 ANXA7_BOVIN      | Annexin A7 OS=Bos taurus GN=ANXA7 PE=1 SV=2                                                                  |
| 315 | sp Q9H223 EHD4_BOVIN       | EH domain-containing protein 4 OS=Homo sapiens GN=EHD4 PE=1 SV=1                                             |
| 316 | sp Q8WNW3 PLAK_PIG         | Junction plakoglobin OS=Sus scrofa GN=Jup PE=2 SV=1                                                          |
| 317 | sp Q9IK81 MYG1_MOUSE       | UPF0160 protein MYG1, mitochondrial OS=Mus musculus GN=Myg1 PE=2 SV=1                                        |
| 318 | sp P17980 PR56A_HUMAN      | 26S protease regulatory subunit 6A OS=Homo sapiens GN=PSMC3 PE=1 SV=3                                        |
| 319 | sp Q5EAC6 CDC37_BOVIN      | Hsp90 co-chaperone Cdc37 OS=Bos taurus GN=CDC37 PE=2 SV=1                                                    |
| 320 | sp Q9CV86 ARPC2_MOUSE      | Actin-related protein 2/3 complex subunit 2 OS=Mus musculus GN=Arpc2 PE=1 SV=3                               |
| 321 | sp P50995 ANX11_HUMAN      | Annexin A11 OS=Homo sapiens GN=ANXA11 PE=1 SV=1                                                              |
| 322 | sp Q95204 CY561_SHEEP      | Cytochrome b561 OS=Ovis aries GN=Cyb561 PE=2 SV=1                                                            |
| 323 | sp P79342 S10AD_BOVIN      | Protein S100-A13 OS=Bos taurus GN=S100A13 PE=3 SV=2                                                          |
| 324 | sp Q5NV72 ZN770_PONAB      | Zinc finger protein 770 (Fragment) OS=Pongo abelii GN=ZNF770 PE=2 SV=1                                       |
| 325 | sp Q4PLI0 NEDD8_RABIT      | NEDD8 OS=Oryctolagus cuniculus GN=NEDD8 PE=3 SV=1                                                            |
| 326 | sp Q920N1 IF2G_MOUSE       | Eukaryotic translation initiation factor 2 subunit 3, X-linked OS=Mus musculus GN=EIF2S3X PE=1 SV=2          |
| 327 | sp Q99969 RARR2_HUMAN      | Retinoic acid receptor responder protein 2 OS=Homo sapiens GN=RARRS2 PE=1 SV=1                               |
| 328 | sp Q6YKA4 HMGB1_CANFA      | High mobility group protein B1 OS=Canis familiaris GN=HMGB1 PE=2 SV=3                                        |
| 329 | sp Q9N0Y0 VAMP2_MACMU      | Vesicle-associated membrane protein 2 OS=Macaca mulatta GN=VAMP2 PE=3 SV=3                                   |
| 330 | sp Q16881 TXNR1_HUMAN      | Thioredoxin reductase 1, cytoplasmic OS=Homo sapiens GN=TXNRD1 PE=1 SV=3                                     |
| 331 | sp Q32C42 ADHX_BOVIN       | Alcohol dehydrogenase class-3 OS=Bos taurus GN=ADH5 PE=2 SV=1                                                |
| 332 | sp P33097 AATC_BOVIN       | Aspartate aminotransferase, cytoplasmic OS=Bos taurus GN=GOT1 PE=1 SV=3                                      |
| 333 | RRRRRsp AQCPA3 BTBD1_BOVIN | REVERSED BTB/POZ domain-containing protein 19 OS=Bos taurus GN=BTBD19 PE=2 SV=1                              |
| 334 | sp P27816 MAP4_HUMAN       | Microtubule-associated protein 4 OS=Homo sapiens GN=MAP4 PE=1 SV=3                                           |
| 335 | sp Q5R5U1 RAB10_PONAB      | Ras-related protein Rab-10 OS=Pongo abelii GN=RAB10 PE=2 SV=1                                                |
| 336 | sp Q68FQ0 TCPE_RAT         | T-complex protein 1 subunit epsilon OS=Rattus norvegicus GN=Cct5 PE=1 SV=1                                   |
| 337 | sp Q5RAE1 CPNE3_PONAB      | Copine-3 OS=Pongo abelii GN=CPNE3 PE=2 SV=1                                                                  |
| 338 | RRRRRsp Q9D700 DUS26_MOUSE | REVERSED Dual specificity protein phosphatase 26 OS=Mus musculus GN=Dusp26 PE=2 SV=2                         |
| 339 | sp Q75339 CILP1_HUMAN      | Cartilage intermediate layer protein 1 OS=Homo sapiens GN=CILP PE=1 SV=3                                     |
| 340 | sp Q9UBG0 MRC2_HUMAN       | C-type mannose receptor 2 OS=Homo sapiens GN=MRC2 PE=1 SV=1                                                  |
| 341 | sp Q60763 USO1_HUMAN       | General vesicular transport factor p115 OS=Homo sapiens GN=USO1 PE=1 SV=2                                    |
| 342 | sp P16086 SPTA2_RAT        | Spectrin alpha chain, brain OS=Rattus norvegicus GN=Sptan1 PE=1 SV=2                                         |
| 343 | sp Q5BJY9 K1C18_RAT        | Keratin, type I cytoskeletal 18 OS=Rattus norvegicus GN=Krt18 PE=1 SV=3                                      |
| 344 | sp P62909 RS3_RAT          | 40S ribosomal protein S3 OS=Rattus norvegicus GN=Rps3 PE=2 SV=1                                              |
| 345 | sp P80313 TCPH_MOUSE       | T-complex protein 1 subunit eta OS=Mus musculus GN=Cct7 PE=1 SV=1                                            |
| 346 | sp Q95117 FRP3_BOVIN       | Secreted frizzled-related protein 3 OS=Bos taurus GN=FRZB PE=1 SV=1                                          |
| 347 | sp Q641Y8 DDX1_RAT         | ATP-dependent RNA helicase DDX1 OS=Rattus norvegicus GN=Ddx1 PE=2 SV=1                                       |
| 348 | RRRRRsp Q9H255 RNF39_HUMAN | REVERSED RING finger protein 39 OS=Homo sapiens GN=RNF39 PE=1 SV=2                                           |
| 349 | sp Q9R1P1 PSB3_MOUSE       | Proteasome subunit beta type-3 OS=Mus musculus GN=Psb3 PE=1 SV=1                                             |
| 350 | sp Q3SZF2 ARF4_BOVIN       | ADP-ribosylation factor 4 OS=Bos taurus GN=ARF4 PE=2 SV=3                                                    |
| 351 | sp P05064 ALDOA_MOUSE      | Fructose-bisphosphate aldolase A OS=Mus musculus GN=Aldoa PE=1 SV=2                                          |
| 352 | sp Q04857 C06A1_MOUSE      | Collagen alpha-1(VI) chain OS=Mus musculus GN=Col6a1 PE=2 SV=1                                               |
| 353 | sp Q4R572 1433B_MACFA      | 14-3-3 protein beta/alpha OS=Macaca fascicularis GN=YWHAB PE=2 SV=3                                          |
| 354 | sp Q68FP1 GELS_RAT         | Gelsolin OS=Rattus norvegicus GN=Gsn PE=1 SV=1                                                               |
| 355 | sp Q8TER5-3 SOLO_HUMAN     | Isoform 3 of Protein SOLO OS=Homo sapiens GN=SOLO                                                            |
| 356 | sp P35221-2 CTNA1_HUMAN    | Isoform 2 of Catenin alpha-1 OS=Homo sapiens GN=CTNNA1                                                       |
| 357 | sp Q10994 CYTB_SHEEP       | Cystatin-B OS=Ovis aries GN=CSTB PE=1 SV=1                                                                   |
| 358 | sp Q43242 PSMD3_HUMAN      | 26S proteasome non-ATPase regulatory subunit 3 OS=Homo sapiens GN=PSMD3 PE=1 SV=2                            |
| 359 | sp Q01634 IDUA_CANFA       | Alpha-L-iduronidase OS=Canis familiaris GN=IDUA PE=1 SV=1                                                    |
| 360 | sp Q60692 PSB6_MOUSE       | Proteasome subunit beta type-6 OS=Mus musculus GN=Psb6 PE=1 SV=3                                             |
| 361 | sp P78417 GSTO1_HUMAN      | Glutathione S-transferase omega-1 OS=Homo sapiens GN=GSTO1 PE=1 SV=2                                         |
| 362 | sp P47959 HPRT_MERUN       | Hypoxanthine-guanine phosphoribosyltransferase OS=Meriones unguiculatus GN=HPRT1 PE=2 SV=2                   |
| 363 | sp Q5T7N8 F27D1_HUMAN      | Protein FAM27D1 OS=Homo sapiens GN=FAM27D1 PE=3 SV=2                                                         |
| 364 | sp Q9XSJ4 ENOA_BOVIN       | Alpha-enolase OS=Bos taurus GN=ENO1 PE=1 SV=4                                                                |
| 365 | sp Q9H4M9 EHD1_HUMAN       | EH domain-containing protein 1 OS=Homo sapiens GN=EHD1 PE=1 SV=2                                             |
| 366 | sp P07450 CAH3_HORSE       | Carbonic anhydrase 3 OS=Equus caballus GN=CA3 PE=1 SV=2                                                      |
| 367 | sp Q63610 TPM3_RAT         | Tropomyosin alpha-3 chain OS=Rattus norvegicus GN=Tpm3 PE=1 SV=2                                             |
| 368 | sp Q9NQ57-2 INCE_HUMAN     | Isoform 2 of Inner centromere protein OS=Homo sapiens GN=INCENP                                              |
| 369 | sp Q70435 PSA3_MOUSE       | Proteasome subunit alpha type-3 OS=Mus musculus GN=Psa3 PE=1 SV=3                                            |
| 370 | sp Q70492 SNX3_MOUSE       | Sorting nexin-3 OS=Mus musculus GN=Snx3 PE=2 SV=3                                                            |
| 371 | sp Q9WV84 SLIT3_MOUSE      | Slit homolog 3 protein OS=Mus musculus GN=Slit3 PE=2 SV=1                                                    |
| 372 | sp Q43252 PAPS1_HUMAN      | Bifunctional 3'-phosphoadenosine 5'-phosphosulfate synthase 1 OS=Homo sapiens GN=PAPS1 PE=1 SV=2             |
| 373 | sp Q4R416 CAP1_MACFA       | Adenylyl cyclase-associated protein 1 OS=Macaca fascicularis GN=CAP1 PE=2 SV=3                               |
| 374 | sp P47199 QOR_MOUSE        | Quinone oxidoreductase OS=Mus musculus GN=Cryz PE=2 SV=1                                                     |
| 375 | sp Q61481 PDE1A_MOUSE      | Calcium/calmodulin-dependent 3',5'-cyclic nucleotide phosphodiesterase 1A OS=Mus musculus GN=Pde1a PE=2 SV=1 |
| 376 | sp Q92204 HNRPC_MOUSE      | Heterogeneous nuclear ribonucleoproteins C1/C2 OS=Mus musculus GN=Hnrnpc PE=1 SV=1                           |
| 377 | sp Q6AY09 HNRH2_RAT        | Heterogeneous nuclear ribonucleoprotein H2 OS=Rattus norvegicus GN=Hnrhp2 PE=1 SV=1                          |
